# Data quality reporting: good practice for transparent estimates from forest and land cover surveys

Luca Birigazzi<sup>a</sup>, Timothy G. Gregoire<sup>b</sup>, Yelena Finegold<sup>a</sup>, Rocío D. Córdor Golec<sup>a</sup>, Marieke Sandker<sup>a</sup>, Emily Donegan<sup>c</sup>, Javier G. P. Gamarra<sup>a,d</sup>

<sup>a</sup>*Forestry Department, FAO Viale delle Terme di Caracalla, 00153 Rome, Italy*

<sup>b</sup>*School of Forestry and Environmental Studies Yale University, New Haven, CT 06511, USA*

<sup>c</sup>*BOKU University of Natural Resources and Life Sciences, Gregor-Mendel-Strae 33, 1180 Wien, Austria*

<sup>d</sup>*Corresponding author: Javier G. P. Gamarra, [javier.garciaperez@fao.org](mailto:javier.garciaperez@fao.org)*

---

## Abstract

The need to provide transparent and reliable Greenhouse Gas (GHG) emission estimates is strongly emphasized in the context of international reporting under the United Nations Framework Convention on Climate Change (UNFCCC) and the Paris Agreement. Yet it is difficult to find specific guidance about what information is really needed to evaluate the quality of the emission factors or activity data used for GHG emission estimates. The most commonly used indicator of the reliability of an estimation procedure (and one of the few indicators explicitly mentioned in the 2006 IPCC guidelines) is the so-called confidence interval, usually at a confidence level of 90% or 95%. This interval, however, is unlikely to be a meaningful indicator of the quality of the estimate, if not associated with additional information about the estimation and survey procedures (such as on the sampling design, measurement protocols or quality control routines, among others). We provide a review of the main sources of error that can have an impact on the precision and accuracy of the estimation of both emission factors and activity data and a list of the essential survey features that should be reported to properly evaluate the quality of a GHG emission estimate. Such list is also applicable to the reporting of national forest inventories and of area estimation of activity data, and includes the case in which confidence intervals are obtained using error propagation techniques.

*Keywords:* Emission factor, Activity Data, Greenhouse gas inventory,

## REDD+, Survey sampling, Uncertainty

---

### 1 **1. Introduction**

2 In order to account for green house gas emissions from the Land Use, Land  
3 Use Change and Forestry (LULUCF) sector two approaches are commonly  
4 used: *stock change*, when emissions are estimated as a carbon stock differ-  
5 ence between two consecutive surveys, and *gain-loss*, whenever emissions are  
6 estimated as the product of areas of land use or land use change (aka *activity*  
7 *data*) and the specific carbon coefficient (aka *emission factors*) associated to  
8 them (IPCC 2006, Vol.4 Chap.2, GFOI 2016). The Intergovernmental Panel  
9 on Climate Change (IPCC) guidelines provide a hierarchical classification of  
10 estimation methods, consisting of three levels of methodological complexity,  
11 called tiers (IPCC2003, Chap.3.1.5; IPCC 2006, Vol.1 Chap.1.2). Tier 2 and  
12 tier 3 methods, which are considered the most certain and reliable, both rely  
13 on sampling up to a certain extent. In order to account for the emissions from  
14 LULUCF under these higher tiers, sampling techniques are commonly used  
15 for the estimation of both emission factors and activity data. The former are  
16 usually derived from in-situ assessments, such as forest inventories or from  
17 permanent or temporary experimental plots (Chirici et al., 2011; Köhl et al.,  
18 2015), the latter from model-based map classification (wall-to-wall maps)  
19 or design-based area estimation through visual, or augmented visual (Bey  
20 et al., 2016) interpretation (McRoberts, 2014; FAO, 2016). More advanced  
21 methods can involve the use of large-area forest biomass maps, however their  
22 use is still limited in the context of GHG inventory and REDD+ reporting  
23 (Sandker et al., 2018). In any case, in order for a country to produce reli-  
24 able higher-tier estimates it is necessary to largely rely on data coming from  
25 sampling (IPCC, 2003).

26 These sample-based estimates are required to be: (1) “accurate, in the  
27 sense that they are neither over- nor underestimates as far as can be judged”,  
28 and (2) precise, “in the sense that uncertainties are reduced as far as prac-  
29 ticable” (IPCC 2003, Chap.5.2; IPCC 2006, Vol.1 Chap.3). Precision and  
30 accuracy, as they are defined in the 2003 and 2006 IPCC guidelines, are well  
31 known concepts in the literature on probability sampling, where they are  
32 usually expressed in terms of variance of an estimator (alternatively called  
33 sampling variance) and bias, respectively. As mentioned in the IPCC guide-  
34 lines, it is worthwhile to mind the difference between the variance of the

35 population and the variance of an estimator. The former provides a measure  
36 of how dispersed the values of a population are, while the latter provides a  
37 measure of the precision of the estimator used. Even though under simple  
38 random sampling there is a direct relationship between these two quantities<sup>1</sup>,  
39 they still describe different features, have different applications and should  
40 not be confused.

41 As for any other probabilistic survey, the precision and accuracy of a  
42 GHG inventory or of a REDD+ results report can be fully ascertained only  
43 in the unrealistic case in which the exact values of interest for all elements in  
44 the population are known. In all other cases, precision and accuracy need to  
45 be estimated from the sample itself and/or evaluated based on the available  
46 information on the studied population, sampling design, statistical assump-  
47 tions and measurement methods used to obtain the estimates. The so-called  
48 confidence interval is one of the most commonly reported indicators of the  
49 reliability of an estimation. However, it does not usually include all sources  
50 of error in the survey. Confidence intervals typically include the sampling  
51 error and in some cases may also partially include some non-sampling er-  
52 rors, such as measurement or model error (cf. Section 2.4 below), but do  
53 not measure the bias and other types of non-sampling error (Hanson, 1978).  
54 In addition, the confidence interval is a random variable itself and is also  
55 estimated from the sample (that is, different random samples will produce  
56 different intervals). Several alternative estimation methods may exist to ob-  
57 tain a confidence interval and not all of them are adequate for the specific  
58 sampling design adopted (Cochran, 1977; Särndal et al., 1992). In many ap-  
59 plications, bias and sampling variance are often treated separately, but they  
60 still remain closely interrelated and if the survey is substantially biased, the  
61 resulting confidence interval will also be distorted (cf. Raj 1968, Chap. 2.11;  
62 Cochran 1977, Chap 1.8). In fact, a point estimate and its associated con-  
63 fidence interval do not reveal whether the reported results are precise and  
64 accurate.

65 Uncertainty is defined in the IPCC (2006) guidelines as the lack of knowl-  
66 edge of the true value of a variable and the word is often used in a broader  
67 sense that encompasses both precision and accuracy. The need to esti-

---

<sup>1</sup>Under a simple random sampling design the variance of the estimator of the sample mean is given by the variance of the population divided by number of elements in the sample.

68 mate and report the uncertainties associated with the estimates is repeat-  
69 edly stressed in the IPCC guidelines (2003; 2006). They distinguish between  
70 uncertainties that are amenable to quantification and others which are non-  
71 quantifiable (IPCC, 2006, Vol. 1, Chap. 3). The former, typically including  
72 sampling and measurement errors, can be expressed using a confidence in-  
73 terval, while the latter, which may include bias or any type of conceptual or  
74 inferential imperfections, cannot. As reported in the IPCC guidelines quan-  
75 titative uncertainty analysis is performed by estimating the 95 percent con-  
76 fidence interval of the emission and removals. In contrast, non-quantifiable  
77 errors, if they cannot be prevented, should be identified, documented and  
78 possibly corrected by the compilers. To this end, the guidelines provide eight  
79 broad causes of error to be considered by the inventory developers (IPCC,  
80 2006, Vol. 1, Chap. 3) and general guidance on the procedures needed to as-  
81 sess and maintain the quality of the inventory (IPCC 2003, Chap. 4.4; IPCC  
82 2006, Vol.1, Chap.6). However, this recommendation proves to be quite  
83 generic and mainly focused on integrity and completeness of the data and  
84 does not provide detailed guidance on how to report information stemming  
85 from a probability survey.

86 In the context of a GHG inventory, uncertainty analysis is rather consid-  
87 ered as a means to help prioritize national efforts to reduce the uncertainty  
88 of inventories in the future, and to guide decisions on methodological choice.  
89 They do not set any specific standards concerning which aspects of the sur-  
90 vey should be documented. However, it can be beneficial for the reporting  
91 Parties to duly demonstrate that their estimates are reliable and that the  
92 methods used to obtain them are adequate. From a statistical point of view  
93 the confidence interval alone should not be the only quality indicator. Para-  
94 doxically, an improvement in survey methods or an increased knowledge of  
95 the studied population can lead to wider confidence intervals and give the  
96 misleading idea of a decrease in the quality of the estimates. This manuscript  
97 aims to provide a comprehensive list of information that: (1) sheds light to  
98 reporting parties into confronting this paradox, and (2) should be reported  
99 to properly evaluate the quality of a GHGI/REDD+ report estimate for the  
100 LULUCF sector. This information is mostly focused on improving the qual-  
101 ity declaration of the data, its sources, and the reported estimates as a good  
102 practice guidance.

## 103 2. Guidelines for reporting survey research

104 Since the 1950s, there have been policies to describe the quality of statis-  
105 tics derived from survey sampling (Statistical Office of the United Nations,  
106 1950; Gonzalez et al., 1975) and many national survey organizations have  
107 developed their own quality declaration guidelines (Statistics Canada, 2000;  
108 Full et al., 2001; Brackstone, 2003; Office for National Statistics, 2007; Jack-  
109 son et al., 2013; Brancato et al., 2016). Even though many of those recom-  
110 mendations are certainly useful and applicable in the context of REDD+ or  
111 GHG reporting, there are still certain aspects that are somewhat peculiar  
112 to the LULUCF sector that are not fully elaborated in those more generic  
113 policies. Moreover, the rapid developments in many methodological (and  
114 technological) aspects of land use and forest monitoring call for urgent and  
115 specific updates in their guidelines. We provide below a description of the  
116 main sources of errors which can arise during the estimation of emission  
117 factors and activity data from LULUCF sector survey data. For each er-  
118 ror source we propose a set of key questions which should be considered by  
119 those engaged in reporting or reviewing survey results. The answers to such  
120 questions will constitute the essential body of information that should be  
121 reported to allow reviewers, reporting Parties and practitioners to properly  
122 evaluate the quality of a GHGI/REDD+ report estimate. When the emission  
123 factors and activity data have been estimated through independent surveys  
124 the answers should be provided for each of them. Guidance for the reporting  
125 of the combined uncertainty of emission factors and activity data using error  
126 propagation techniques is provided in section 2.3.

### 127 2.1. General information about the survey

128 This section aims to provide general information about the survey, includ-  
129 ing a description of the population sampled, the data collected, the methods  
130 of measurement and the sampling design adopted. We assume that readers  
131 already have some knowledge about the basics of sampling.

#### 132 2.1.1. Information about the sampled population

133 The term *sampled population* denotes the “aggregate from which the sam-  
134 ple is chosen” (Cochran, 1977). The population is composed of *elements*, to  
135 which one or more variable of study are associated (Särndal et al., 1992,  
136 Chap. 1.2). The sampled population is identified at the planning phase of a  
137 survey and should be defined in such a way that there cannot be any ambi-  
138 guity about whether or not an element is part of the population (Köhl et al.,

139 2006). When sampling for emission factor or activity data for the LULUCF  
140 sector the sampled population is often defined as a geographic area. In this  
141 case, the population includes all locations that have non-zero probability of  
142 being included in the sample. In National Forest Inventories (NFIs) the pop-  
143 ulation typically corresponds to the whole country area or, in some cases,  
144 to the area of the country that is considered forest. When subnational sur-  
145 veys are carried out, the sampled population may correspond to a specific  
146 administrative unit or to a particular ecological zone.

147 When ground-surveys are carried out it is possible to define the popula-  
148 tion as a continuous areal frame. That is, it comprises an infinite number of  
149 spatial locations (Gregoire and Valentine, 2008; Köhl et al., 2006). In remote  
150 sensing applications, in contrast, the population is often defined as a finite  
151 set of non-overlapping spatial units that form a partition of the region of  
152 interest, typically pixels, block of pixels or polygons. In this case, the choice  
153 of the type of spatial units that tessellate the population has an impact on the  
154 survey estimates (Stehman and Wickham, 2011) and should be adequately  
155 described.

156 **Set 1 of key questions: Sampled population**

- 157 (a) What is the population from which the sample is chosen?
- 158 (b) If the sampled population is defined as a geographic area, are you able  
159 to provide a map of it?
- 160 (c) Is the sampled population defined as a finite set of discrete spatial  
161 units? If so, which ones? are they uniform? what is their area?

162 *2.1.2. Information about the target population*

163 The term *target population* denotes the population about which the infor-  
164 mation is wanted. Similarly to above, when sampling for emission factors or  
165 activity data for the LULUCF sector the targeted population is often defined  
166 as a geographic area (McRoberts et al., 2015). This may or may not coincide  
167 with the sampled population. In fact, in GHG inventories the population of  
168 interest is often a sub-group of the sampled population, created after (and  
169 independently of) the sample selection, such as a specific land use, forest  
170 type or climatic zone (cf. Section 2.2.3 below). Figure 2 provides a visual  
171 representation of some cases in which target and sampled population differ.

172 **Set 2 of key questions: Target population**

- 173 (a) What is the population for which we want to estimate emissions/removals?  
174 (b) For which time period do we need the emissions/removals?  
175 (c) If the target population is defined as a geographic area, are you able  
176 to provide a map of it?  
177 (d) If the target population is not defined as a geographic area, are you  
178 able to provide a list of the elements that compose it?

179 *2.1.3. Sampling selection*

180 There are many existing approaches to select a sample from the popu-  
181 lation. The choice of the sampling method has an important effect on the  
182 quality of the estimates and should be carefully described. In NFIs or in land  
183 cover area estimation the sample is usually composed of a set of locations  
184 selected from a continuous areal frame (such as a geographical region). The  
185 unit of area that is observed is often called a plot. A sampling unit can  
186 also be composed of a group (cluster) of subplots located near each other  
187 (Kangas and Maltamo, 2006) and/or of one or more nested smaller subplots  
188 (Köhl et al., 2006).

189 **Set 3 of key questions: Sampling selection**

- 190 (a) Is the survey based on a probability sample<sup>2</sup>?  
191 (b) What sampling design has been used?  
192 (c) What was the planned size of the sample?  
193 (d) What is the size and shape of the sampling units?  
194 (e) Is the sampling unit composed of a cluster of subplots?  
195 (f) Is the sampling unit composed of one or more nested smaller subplots?

---

<sup>2</sup>Non-probabilistic sample selection is sometimes carried out in the context of REDD+ and the LULUCF sector. This can happen, for example, whenever the sample is selected based on expert choice (it can be the case of training point selection for supervised land cover classification). As a result, it is not possible to calculate the probability of each population element to be included in the sample (the so-called inclusion probability). Under a design-based inference this results in the fact that sampling variances (and therefore the sampling error) cannot be calculated *unbiasedly*. Conversely, it might not affect the predictions in a model-based framework



- 196 (g) Was the sample selected following stratified sampling?
- 197 (h) If so, which are the strata? how were they constructed? What is their  
198 size?
- 199 (i) If so, when the strata are defined as geographical areas, are you able  
200 to provide a map of them?
- 201 (j) Repetition: Is the survey isolated or is it part of a series of repeated  
202 surveys? If so, what is the proportion of samples that were repeated?

203 *2.1.4. Data collection, labeling, coding and editing*

204 Once the sampling design is established, the data are collected according  
205 to the prescribed measurement protocol, coded and entered into a database.  
206 In NFIs, the protocol for collecting the data in the sampling units is usually  
207 described in a field manual, and in remote sensing applications (such as ac-  
208 curacy assessment of maps) the procedure used to collect information from  
209 each sampling unit is often referred to as *evaluation protocol* (Stehman and  
210 Czaplewski, 1998). The choice of the data labeling and of the data manage-  
211 ment system has a large impact on the precision and accuracy of the results.  
212 While conceiving the survey, a particular attention should be put in the def-  
213 inition of categorical variables, such as for example land cover. In order to  
214 assign each element to a certain land cover class it is necessary to have a  
215 consistent and complete land cover classification system. The classification  
216 system should be defined in such a way that each land cover element can  
217 clearly be assigned into one and only one land cover class. In remote sensing  
218 applications, the set of procedure to assign a classification to each sampling  
219 unit is often called *labelling protocol* (Stehman and Czaplewski, 1998) and  
220 should be adequately described.

221 **Set 4 of key questions: Data collection and processing**

- 222 (a) Which attributes have been observed in the sampling units?
- 223 (b) What was the measurement protocol used to measure the variables of  
224 interest?
- 225 (c) Has a written field manual or evaluation protocol been produced? Can  
226 the party provide it?



- 227 (d) Can the party provide a clear and unambiguous definition for each class  
228 of categorical variables in the survey, including a land cover classifica-  
229 tion system (if any)?
- 230 (e) Has the classification system (if any) been modified during the imple-  
231 mentation of the survey? If so, the final estimates? Did the party put  
232 in place any system to account for this change?
- 233 (f) Has the field measurement protocol been changed during the implemen-  
234 tation of the survey? If so, how does that impact the final estimates?  
235 Did the party put in place any system to account for this change?
- 236 (g) How were the data stored and processed?

## 237 2.2. Information about error sources

238 This section aims to provide specific information about the potential  
239 sources of error in the survey which require description and analysis. In  
240 the literature on survey sampling the sources of error are typically divided  
241 into the two broad categories of sampling and non-sampling errors. Abiding  
242 by the terminology used in Särndal et al. (1992), non-sampling errors can be  
243 further divided into 1) *errors due to nonobservation*, when it is not possi-  
244 ble to obtain data from parts of the population of interest and 2) *errors in*  
245 *observations*, when the recorded value of the sampled element differs from  
246 its real value. The former includes frame imperfections and non-response  
247 issues, the latter measurement and processing errors. All these sources of  
248 errors can affect both the precision and the accuracy of the estimates and  
249 will be discussed in detail in the next sections, all enumerated and linked  
250 to corresponding sets of key questions (Fig. 1). A complete theory of non  
251 sampling error has not been elaborated yet (cf. Särndal et al., 1992, Chap.  
252 14.6) and the schema proposed in Fig. 1 does not intend to provide a ex-  
253 haustive and consistent classification. Moreover, Figure 1 does not define in  
254 detail all sources of uncertainty that can arise during the estimation of emis-  
255 sion factors or activity data. The aim here is rather to provide a conceptual  
256 framework to group the errors into major broad categories. The workflow  
257 for satellite data processing or, for example, for tree field measurement, in-  
258 volves multiple steps that are not explicitly mentioned in Fig. 1 (such as  
259 satellite sensor calibration or tree biomass allometric model selection). All  
260 these steps, however, can always be classified into one of the broad categories  
261 mentioned above. More detailed lists of the error sources typically arising

262 in the processing chain to calculate forest emission factors/activity data are  
 263 provided elsewhere (Hill et al., 2013; Sandker et al., 2018).

264 There are two essential complementary approaches to deal with each of  
 265 the error sources: 1) measures put in place to prevent (or possibly avoid)  
 266 the error before it occurs (Duvemo and Lämås, 2006; Gasparini et al., 2009)  
 267 and 2) apply methods to properly account for the error once it has occurred  
 268 (Pollard et al., 2006; Ferretti et al., 2009; Gormanson et al., 2018). A com-  
 269 plete assessment of any survey result cannot be done without a thorough  
 270 analysis of these two aspects. Hence, as a matter of transparency, reporting  
 271 parties should take care to describe both of them. In the following sections  
 272 for each error we provide recommendations to ensure that both aspects are  
 273 duly included in the reporting.

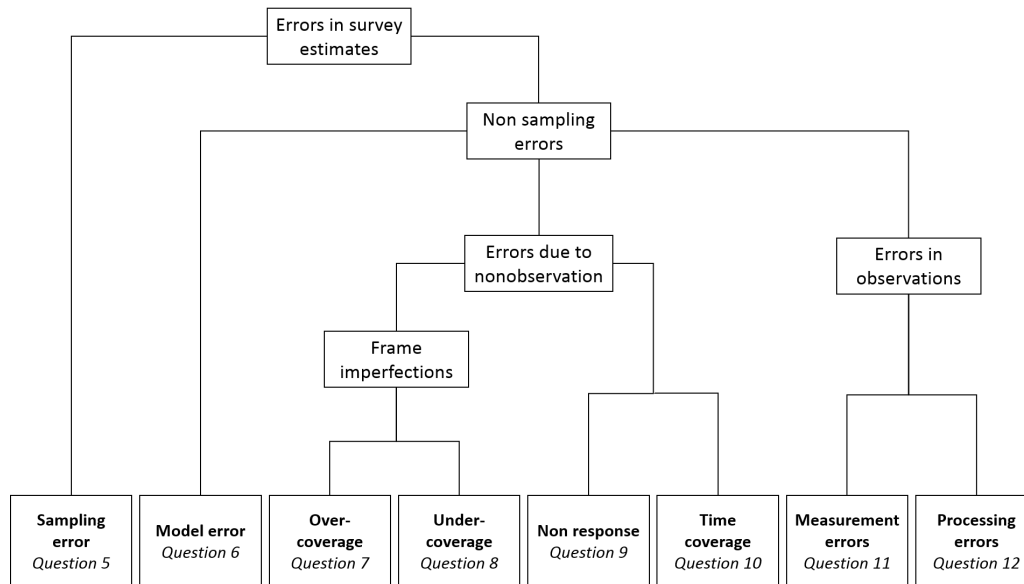

Figure 1: **Categories of potential error sources in the LULUCF sector.** Broad categories of error sources in surveys sampling and a reference to the corresponding set of key questions in this paper. This schema is aimed to provide a practical framework for reporting survey results.

### 274 2.2.1. Sampling error

275 The sampling error denotes the error caused by the fact that only a sub-  
 276 set (a sample) of the population is measured. Even if no error is made in

277 measuring or processing the data, it is still evident that the estimates based  
278 on the sample will differ from the real population values. On the other hand,  
279 it is intuitive that different samples of the same population will provide dif-  
280 ferent estimates (unless the population is composed of identical elements).  
281 The *variance* of an estimator (or sampling variance) provides a measure of  
282 the sample-to-sample variation and the *bias* of an estimator is the difference  
283 between the real population value and the average of all possible sample esti-  
284 mates. Under many sampling designs it is possible to provide a quantitative  
285 unbiased estimate of the sampling variance. For any given estimator of a  
286 population parameter many statistics manuals also provide: 1) the formula  
287 for the *estimator variance* (in practice an unknown quantity which depends  
288 on the complete set of population values) and 2) a formula to estimate unbi-  
289 asedly the estimator variance from the sample data (cf. Särndal et al., 1992,  
290 Remark 2.8.2). The latter is the one ordinarily used to compute the sampling  
291 error. Hence, in most of the cases the sampling variance falls within the IPCC  
292 category of errors amenable to quantification and can be expressed using a  
293 confidence interval. In practice, confidence intervals calculated on the sam-  
294 pling variance are the most commonly reported indicators of the reliability  
295 of an estimation. Larger sampling variances will result in wider confidence  
296 intervals, hence in an overall decrease of precision. The bias of the estimator,  
297 conversely, is often not quantifiable in practice and its magnitude can only  
298 be inferred from the sampling design, the estimators used and the population  
299 parameters being estimated.

300 Sampling error will always be present, unless the population is enumer-  
301 ated in its entirety. Typical examples of surveys sampling used in REDD+  
302 and GHG reporting are national forest inventories (for forest emission fac-  
303 tors) or area estimation (for land use/land use change activity data) (Olofsson  
304 et al., 2014). For a given sampling design there may exist several alternative  
305 estimators, each one having different statistical properties. The reporting  
306 Parties should take care in selecting the best estimator, where best here  
307 means having small variance and being unbiased (or approximately unbi-  
308 ased). The properties of the estimators under the most common sampling  
309 designs have been thoroughly investigated, so that it is usually possible to  
310 estimate their variances and to ascertain whether or not they are unbiased  
311 (or approximately unbiased). A plethora of manuals has been dedicated  
312 to the theory and practice of sampling methods, including the renowned  
313 texts of Cochran (1977) and Särndal et al. (1992). de Vries (1986), Kangas  
314 and Maltamo (2006), Köhl et al. (2006), Gregoire and Valentine (2008) and

315 Mandallaz (2008), among others, provide a more detailed review of sampling  
316 strategies for natural resources and forest inventories.

317 **Set 5 of key questions: Sampling error**

318 (a) Which estimator has been used to estimate the emission/removal? Can  
319 the party provide the mathematical formula used?

320 (b) Has the variance of the estimator been estimated? If so, which estima-  
321 tor was used to compute it? Can the party provide the mathematical  
322 formula used?

323 (c) Is the estimator for the population parameter and its variance estimator  
324 unbiased (or approximately unbiased) under the sample design adopted  
325 in the survey?

326 *2.2.2. Model error*

327 Many of the variables of interest in REDD+ or GHG reporting are not  
328 directly measured in the field but estimated from other observed variables.  
329 This is the case of tree biomass, carbon or volume, usually predicted using  
330 allometric models with one or more easy-to-measure explanatory variables  
331 (such as tree height or diameter at breast height). The fact that the variables  
332 of interest are predicted and not measured adds additional uncertainty to the  
333 estimation process and is likely to result in a decrease of both precision and  
334 accuracy. Model error is used here to denote the error between the real  
335 element value (such as the aboveground biomass of a certain tree) and the  
336 value predicted by the model (assuming no measurement or precessing error  
337 are made). Two main sources of uncertainty contribute to this type of error:  
338 the uncertainty in the estimation of model parameters and the random model  
339 residuals. In large area surveys such as NFIs, however, the latter is typically  
340 very small (Chambers and Clark, 2012) and only the error in the estimation  
341 of the model parameters contributes significantly to the total error (Ståhl  
342 et al., 2016).

343 Ideally, model development constitutes a phase of the survey sampling  
344 itself and data needed for model predictions are sampled using the NFI de-  
345 sign. In this case (and if an adequate sampling design is used) it can be  
346 possible to demonstrate that the model prediction is unbiased (or approxi-  
347 mately unbiased). In practice, the application of models developed before and  
348 independently of the survey sampling is common in NFI and GHG reporting.  
349 Regional models, or models constructed by global macro ecological zone, such

350 as the pantropical biomass regression of Chave et al. (2014), are extensively  
351 used worldwide. The implicit (and often critical) assumption here is that the  
352 population for which the model was developed is very similar (if not identical)  
353 to the population of which we want to report the emissions/removals (Cunia,  
354 1986). If this assumption does not hold, the model predictions are very likely  
355 to be biased and such a bias will propagate throughout the whole estimation  
356 process. Some authors also quantify the error in model choice, that is, the  
357 uncertainty due to the fact that more than one models exists in the litera-  
358 ture and the reporting party does not know how to arbitrate between them  
359 (Chave et al., 2004; Picard et al., 2015; Duncanson et al., 2017). Reporting  
360 parties should pay attention to justifying the choice of the models used and  
361 possibly demonstrate their applicability to the target population. In theory,  
362 the model bias can be quantified using specific validation techniques based  
363 on national data (Claeskens et al. 2008, pp. 172 and 232; Woodall et al.  
364 2010). In addition, previously constructed models available in the literature  
365 often do not provide the key statistics needed to compute the model error.  
366 In some cases, methods exist to estimate the model error in absence of the  
367 covariance matrix (Magnussen and Carillo Negrete, 2015) or through sim-  
368 ulation of pseudo-data (Wayson et al., 2015). Methods for accounting for  
369 model errors in NFI when model data are sampled using the NFI design are  
370 presented in Cunia (1986) and Ståhl et al. (2014). Monte Carlo simulations  
371 are also often used to account for the model error (see also section 2.3 below)  
372 and specific statistical software or packages have been developed for this pur-  
373 pose. Réjou-Méchain et al. (2017) provide a Monte Carlo algorithm in R (R  
374 Core Team, 2016) to account for the error in the parameters of the model of  
375 Chave et al. (2014). Specific guidelines for documenting and reporting tree  
376 allometric equations are provided in Cifuentes Jara et al. (2015).

377 Model errors also abound in satellite-derived data. Image preprocessing is  
378 necessary to account for sensor, solar, atmospheric, and topographic effects;  
379 however, it can increase the potential to introduce error (Kennedy et al.,  
380 2009). Supervised and unsupervised image classification errors are particu-  
381 larly pervasive under the LULUCF sector approaches for the generation of  
382 activity data (Potapov et al., 2014) and tend to introduce considerable bias  
383 (Hill et al., 2013; Olofsson et al., 2013, 2014), filtering choices, spatiotemporal  
384 averaging, interpolation and extrapolation, among others, can contribute to  
385 increased uncertainties from satellite-derived data when linked to sampling  
386 through the use of training datasets (Hill et al., 2013).

387 **Set 6 of key questions: Model error**

- 388 (a) Was the variable of interest observed or estimated using a model?
- 389 (b) If so, what model was used?
- 390 (c) What auxiliary variables have been used to estimate the variable of  
391 interest? How have they been collected?
- 392 (d) Were the auxiliary variables available for all population elements?
- 393 (e) Was the model developed independently of the survey (i.e. selected  
394 from models already published in the literature)?
- 395 (f) How was the model selected and how can the party ensure that the  
396 population for which the model was developed is similar to the target  
397 population?
- 398 (g) If the data used to develop the model were collected within the survey,  
399 can the party provide a description of the survey design and of the  
400 model fitting method?
- 401 (h) Was the error in model parameters estimated? how?

402 *2.2.3. Frame imperfections*

403 Ideally, the sampled population should coincide with the population about  
404 which emission factors or activity data are wanted. Any differences between  
405 these two populations may constitute a departure from the ideal conditions  
406 for the probability sampling approach and should be accounted for (Lesser  
407 and Kalsbeek, 1999). Figure 2 shows three examples of frame imperfections  
408 that can arise during the estimation of emissions/removals from LULUCF  
409 sector survey data.

410 *2.2.4. Frame imperfections: under-coverage*

411 If the population that has been sampled is only a subset of the popula-  
412 tion of which we want to estimate emissions/removals, the properties of the  
413 estimates will be affected. In the literature on survey sampling this issue  
414 is often referred to as under-coverage and it is very likely to result in some  
415 bias in the estimates (Särndal et al., 1992; Särndal and Lundström, 2005).  
416 In the context of the REDD+/LULUCF sector this can occur if the Party  
417 wishes to report emissions/removals at national level but without the use

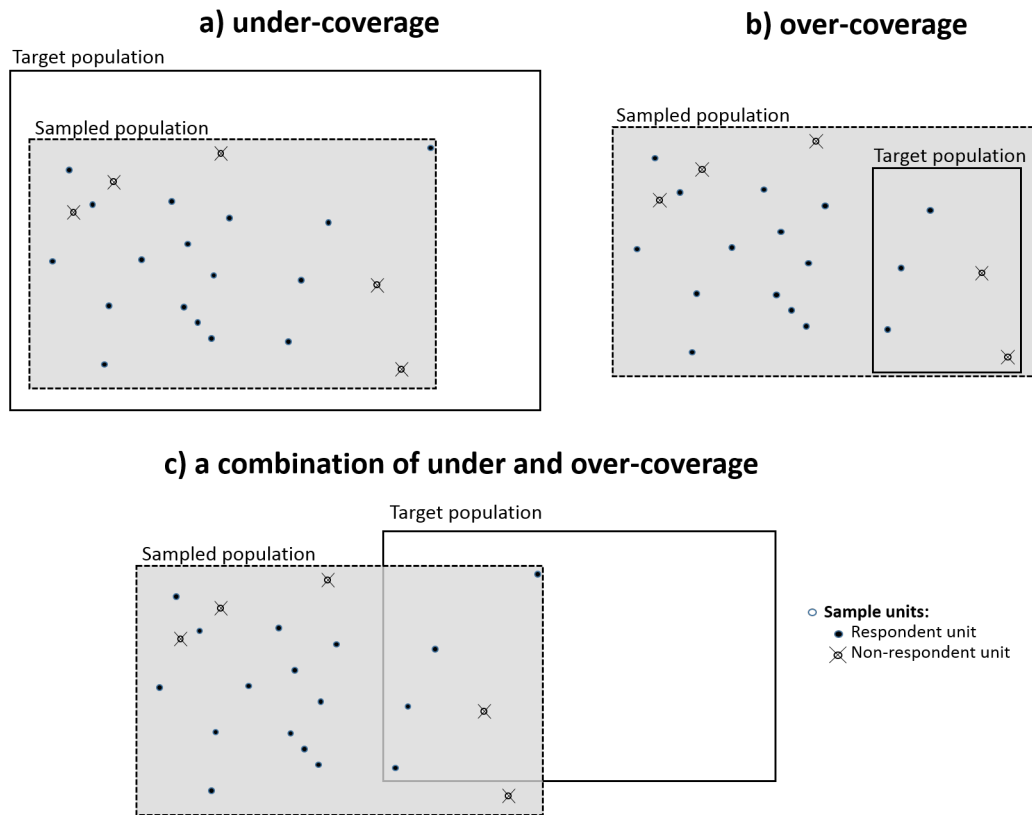

Figure 2: **Non-response and frame imperfections.** Three cases in which the target population (delimited by the solid line) does not coincide with the sampled population (the gray area delimited by the dotted line): a) the sampled population is smaller than the target population and entirely included in the target population; b) the target population is smaller than the sampled population and entirely included in the sampled population; c) the target population is not entirely included in the sampled population and vice versa. Circles represent the sample units and include both the non respondent ones (crossed circles) and the respondent ones (black circles).

418 of data from a national level survey; instead sampling only limited areas of  
419 the country such as a specific region, ecological zone, forest type or ad hoc  
420 research plots. Special estimation techniques (such as weighting or imputa-  
421 tion) can be used to adjust for under-coverage but they often require the use  
422 of auxiliary variables and/or strong assumptions regarding the population of  
423 interest. Even if no advanced modeling techniques are used, a party should



424 still duly report the assumptions and the expert judgments on which they  
425 have relied to correct for under-coverage.

426 **Set 7 of key questions: under-coverage**

427 (a) Is the area over which we want to report the emission/removals entirely  
428 included in the area that has been sampled?

429 (b) If not, how did the party ensure the estimates are representative of  
430 whole target population?

431 *2.2.5. Frame imperfections: over-coverage (domain estimation)*

432 Specific statistical techniques should be used in case the population for  
433 which we want to report the estimate is smaller than the population sam-  
434 pled, that is, the opposite of the case described in section 2.2.4. This can  
435 occur frequently in REDD+/GHG reporting, whenever data from national  
436 or subnational surveys are used to obtain different emission factors/activity  
437 data for a set of subpopulations of interest (such as by forest type, ecological  
438 zone, district, etc.). In the literature on survey sampling these subpopula-  
439 tions of interest are also called domains. The problem stems from the fact  
440 that the number of samples falling into a certain domain is random (i.e. it is  
441 not controlled by the inventory designers) and, most likely, small. This can  
442 result in a decrease in precision (that is, wider confidence intervals) and, if  
443 the right statistical approach is not used, in a bias in the estimate. A detailed  
444 review of basic estimation methods for domains is provided in Section 10.3  
445 of Särndal et al. (1992). A more specific discussion about domain estimation  
446 in the context of GHG and REDD+ reporting is presented in Birigazzi et al.  
447 (2018). If the sample size of a certain domain is particularly small (which  
448 is likely to occur when also the domain size is small, such as a very small  
449 administrative unit or a very rare ecosystem), the estimation may require the  
450 use of ancillary data or model-based inference, which may in turn compound  
451 uncertainties with the model errors previously discussed. In the literature  
452 this issue is often referred to as small area estimation (Schreuder et al., 1993;  
453 Rao and Molina, 2015).

454 **Set 8 of key questions: over-coverage (domain estimation)**

455 (a) Is the area over which we want to report the emission/removals (the  
456 target population) smaller than the area that has been sampled and  
457 included in it?

- 458 (b) If so, has the party used any domain estimation techniques? Which  
459 ones?

#### 460 *2.2.6. Non-response*

461 Non-response is the term used in statistical literature to refer to the fail-  
462 ure to measure some of the units in the selected sample (Cochran, 1977). In  
463 national forest inventories this typically occurs whenever, for example, some  
464 sample plots cannot be accessed by the field crews, and the tree variables  
465 cannot be measured. In the context of remotely sensed area estimation it  
466 can occur if some images are not available or masked by clouds and cannot  
467 be interpreted. Non-response in remote sensing applications can also be due  
468 to a malfunction in the satellite data collection mechanisms, such as the fail-  
469 ure of the Scan Line Corrector of Landsat-7 (Markham et al., 2004), which  
470 results in gaps in the imagery. Both the variance and the bias are likely to  
471 increase together with the non-response rate. The fact that actual sample  
472 size turns out to be smaller than what was originally planned can result in an  
473 increase in variance (i.e. a wider confidence interval). On the other hand, the  
474 bias can derive from the fact that non-responding elements may be system-  
475 atically different from the responding ones (Särndal and Lundström, 2005).  
476 In general, the wider the difference in terms of average values between the  
477 non-respondents and the respondents, the bigger the bias. Methods exist for  
478 dealing with non-response both before and after the data collection. The  
479 latter, which are often referred to as non-response adjustment may include  
480 the use of auxiliary data, as in the case of weighting and imputation meth-  
481 ods, or include an additional subsampling of the non-respondents. General  
482 principles to assist the estimation in the case of non-response are provided  
483 by Särndal and Lundström (2005).

#### 484 **Set 9 of key questions: Non-response**

- 485 (a) Did the party put in place any measure for the prevention or avoidance  
486 of non-response before the data collection? If yes, which ones?
- 487 (b) How many of the selected sampling units have proven to be not mea-  
488 surable/not accessible?
- 489 (c) Which are the main causes for the non-response? Are there any reason  
490 to believe that non-responding elements may be systematically different  
491 from the responding ones?

- 492 (d) Did the party adjust the estimate to overcome the fact that not all the  
493 sampling units have been measured/accessed? If so, how?

494 *2.2.7. Time coverage issues*

495 A survey is typically carried out in different consecutive phases. Sam-  
496 ple selection, data collection, data processing and the estimation obviously  
497 do not occur at the same point in time. Since the attributes of interests of  
498 the population elements are likely to change over time, it is fundamental to  
499 specify the time point in which such attributes were observed. On the other  
500 hand, the reporting parties need to report emissions/removals for a specific  
501 time period. In the literature on survey sampling this is often called *reference*  
502 *time point for the target population*. The lag between the moment in which  
503 the variables are observed and the reference time point for the target pop-  
504 ulation should be as short as possible to reduce the potential time coverage  
505 error (Särndal and Lundström, 2005). In case this time lag is particularly  
506 large it is possible to use specific interpolation and extrapolation techniques  
507 and develop time series for the variables of interest (cf. IPCC, 2006, Vol. 1,  
508 Chap. 5).

509 **Set 10 of key questions: Time coverage issues**

- 510 (a) When was the data collection carried out? What is the time period in  
511 which the variables of interest were observed?
- 512 (b) Is the period over which we want to report emissions/removals included  
513 in the data collection period?
- 514 (c) If not, how did the party ensure that estimates are representative of  
515 the reporting time period?

516 *2.2.8. Measurement error*

517 The measurement error denotes the difference between the real element  
518 value and the values that are measured during data collection. In the context  
519 of an NFI this typically includes the errors in measuring tree dendrometric  
520 parameters (such as tree height, diameter and species, among others), and  
521 in the remotely sensed estimation of activity data, such as through visual  
522 interpretation of aerial or satellite imagery, it may encompass the interpreter  
523 error. The spatial uncertainty associated with the location of the observa-  
524 tions (aka *position error*) is another example of measurement error which  
525 can have considerable impact on the estimation, especially in the remote

526 sensed assisted estimation of land use change (Cressie and Kornak, 2003).  
527 Measurement errors affect both the bias and precision of the estimators.  
528 Measurement error from human interpretation can be reduced by ensuring  
529 adequate training of the field operators or interpreters and by making use  
530 of more accurate measuring instruments. There exist methods to account  
531 for the measurement error after the data collection. They rely on the use  
532 of repeated measurements, re-measurements using more accurate devices or  
533 on the development of more complex measurement models. Cochran (1977,  
534 Sect. 13) and Särndal et al. (1992, Sect. 16) discuss general methods for deal-  
535 ing with measurement errors. Measurement error computation in tree height  
536 (Larjavaara and Muller-Landau, 2013), or among-interpreter error through  
537 augmented visual interpretation (Bastin et al., 2017) are common examples.  
538 A recent paper by McRoberts et al. (2018) investigates the effect of the in-  
539 terpreter error on remote sensing-assisted estimators of land cover class pro-  
540 portions. Measurement errors purely rooted in satellite products may also  
541 include sensor calibration and degradation, irradiance variation, radiometric  
542 resolution, signal digitization, sensor drift or atmospheric attenuation and  
543 path radiance, and will further introduce systematic errors in later processing  
544 and modelling phases (Curran and Hay, 1986; Hill et al., 2013).

545 **Set 11 of key questions: Measurement error**

- 546 (a) Which measuring instruments were used to measure the variables of  
547 interest? Is there any information available about the nominal precision  
548 of the measuring instruments used?
- 549 (b) Which instruments were used to record the geographical location of  
550 the observations? Is there any information available about the nominal  
551 precision of the instruments used?
- 552 (c) Can the party provide the precision with which each measurement is  
553 taken (for example, diameter at breast height to be recorded in cm to  
554 the nearest 0.1 cm)?
- 555 (d) Did the party put in place any measure for the reduction of the mea-  
556 surement error (including position error)? If yes, which ones?
- 557 (e) How many observers/field teams have been employed in the survey?
- 558 (f) which satellite products were used to estimate activity data? what are  
559 the product specifications?

560 *2.2.9. Processing errors*

561 These include the errors occurring during the coding, editing and pro-  
562 cessing of the data. In NFIs this can encompass the mistakes made while  
563 entering the data in the field forms and/or in the database. Since thousands  
564 of elements (such as trees, or land cover sample units) are usually observed  
565 in large area environmental surveys, it is almost inevitable that some incor-  
566 rect values are recorded. The number of potential processing errors is such  
567 that it would be difficult to provide a complete list. This will depend on the  
568 survey type, on the data processing chain and on the nature of the different  
569 variables collected. In NFIs, in the context of GHG or REDD+ reporting,  
570 dendrometric variables (such as tree height, diameter, species, among oth-  
571 ers) are of great importance and the reporting parties should ensure all of  
572 them have been carefully assessed for quality. Processing errors affect both  
573 the precision and accuracy of the results. Given the multifarious nature  
574 of this source of error, it is difficult to provide a measure of its impact on  
575 the estimates, but it can certainly prove to be extremely relevant when no  
576 preventive or corrective measures are taken. The use of electronic tablets  
577 instead of paper forms (possibly associated with validation rules to warn the  
578 users whenever potentially erroneous values are entered) is an example of a  
579 measure to prevent data entry error in the field. Protocols for data cleaning  
580 in the office may include routines for the identification of outliers or missing  
581 data using graphical or statistical approaches. Methods for filling missing  
582 data and correcting incorrect values may include modelling or interpolation  
583 techniques and should be carefully described by the reporting parties. An  
584 overview of good practice for data entry and data quality control for NFI is  
585 provided by Morales-Hidalgo et al. (2017).

586 **Set 12 of key questions: Processing errors**

- 587 (a) Did the party put in place any measure(s) for the prevention of data  
588 entry error in the field and in the office? If yes, which?
- 589 (b) Which methods were used for the identification of invalid or aberrant  
590 values after the data were entered?
- 591 (c) Which methods were used for correcting missing data and outliers?

592 *2.3. Total (propagating) errors*

593 International reporting of errors to provide a final uncertainty estimate  
594 in the context of REDD+ and GHGI may involve the propagation of some

595 or all of these errors as the total error, in some cases combining both emis-  
596 sion factors and activity data uncertainties. Reporting parties are so far free  
597 to choose which errors to report, although typically they report the sam-  
598 pling error as a minimum. It is trivial, but very important to recall that the  
599 more errors accounted for, the wider the total error reported. In the sim-  
600 plest scenario, often linked to Tier 1 approaches, reporting parties will delve  
601 into the standard formulas for the propagation of error (aka delta method  
602 or Taylor series) (Ku 1966; IPCC 2006, Vol. 1, Chap. 3). These formulas,  
603 much older than some more computational approaches, such as re-sampling,  
604 rely often heavily on assumptions of distributional symmetry, trivial covari-  
605 ance structures, or model misspecifications. However, they are in most cases  
606 standard formulas easy to implement. Monte Carlo approaches are typically  
607 used under higher Tiers estimation methods (Birdsey et al., 2013). They rely  
608 on repetitive random draws of values based on probability density functions  
609 for emission factors and/or activity data. By their very nature, they can  
610 in many cases propagate errors without assuming particular distributions in  
611 residuals and can tackle better correlations between variables or situations  
612 where widespread distributions are the norm (IPCC, 2006). However, they  
613 must be carefully developed and entail larger computational requirements.  
614 In some cases, they may inherit some simple assumptions from purely design-  
615 based estimators or traditional error propagation approaches. As a result,  
616 uncertainty outputs from Monte Carlo approaches are typically provided in  
617 the form of probability density functions, or more simply, as a result of the  
618 likely asymmetric distributions resulting from the computation, they can be  
619 reported through the resulting quantiles (McMurray et al., 2017). Careful  
620 use of assumptions regarding correlations between variables and the use of  
621 sensitivity analyses can not be forgone (Heath and Smith, 2000). Monte  
622 Carlo outputs can often be re-sampled to obtain the final confidence inter-  
623 vals. Rubinstein and Kroese (2008) provide a good textbook to delve into  
624 the topic. Although not too often used so far, example calculations in the  
625 context of REDD+ are gaining momentum (Pelletier et al., 2011; Köhl et al.,  
626 2015; McRoberts and Westfall, 2016).

627 Currently not included as a calculation option by IPCC, Bayesian ap-  
628 proaches use a form of Monte Carlo computation, but rely on prior infor-  
629 mation to obtain uncertainties (Fox et al., 2011; Molto et al., 2013). Un-  
630 certainty comes in the form of the so-called credible intervals. It is unclear,  
631 however, how these uncertainties should be reported within the context of  
632 this manuscript.

633 **Set 13 of key questions: error propagation**

- 634 (a) Did the Party propagate errors to establish the total error?
- 635 (b) Were all the errors symmetric or normally distributed? If not, how  
636 were those errors reported?
- 637 (c) Which assumptions were taken in regard to the existence of correlations  
638 among the different errors?
- 639 (d) If errors were propagated, which method was used and how was it  
640 justified?
- 641 (e) If the total error followed an asymmetric distribution, how was it re-  
642 ported?

643 *2.4. Good practice for reporting confidence intervals*

644 Confidence intervals (CI) are meant to provide a measure of how well  
645 the parameter of the population has been estimated and are one of the few  
646 indicators of the quality of the estimate explicitly mentioned in the IPCC  
647 guidelines. Even though they usually include only the sampling error, they  
648 may also include one or more of the other errors indicated in Figure 1 (cf.  
649 Fig. 3). It is evident that as more sources of error are included, the wider  
650 the confidence interval will be. In addition to that, the confidence intervals  
651 are also a function of the confidence level: the larger the confidence level,  
652 the wider the confidence interval (the most commonly used confidence levels  
653 being at 90% or 95%). To foster clarity and comparability it is necessary that  
654 the reporting parties, when reporting a CI, clearly specify at least: (1) which  
655 error components have been included in the CI; (2) the confidence level and  
656 (3) the method used for calculating the confidence interval.

657 **3. Conclusions**

658 Estimations of GHG emissions and removals for the LULUCF sector are  
659 often obtained using a combination of remotely sensed and ground-based  
660 observations. In both cases this information is usually collected through  
661 survey sampling techniques. In order to be compliant with the IPCC good  
662 practice guidance for greenhouse gas inventories the estimation is required to  
663 be transparent, unbiased and as precise as possible. However, assessing the  
664 precision and accuracy of large-area surveys is not a easy task, requiring a



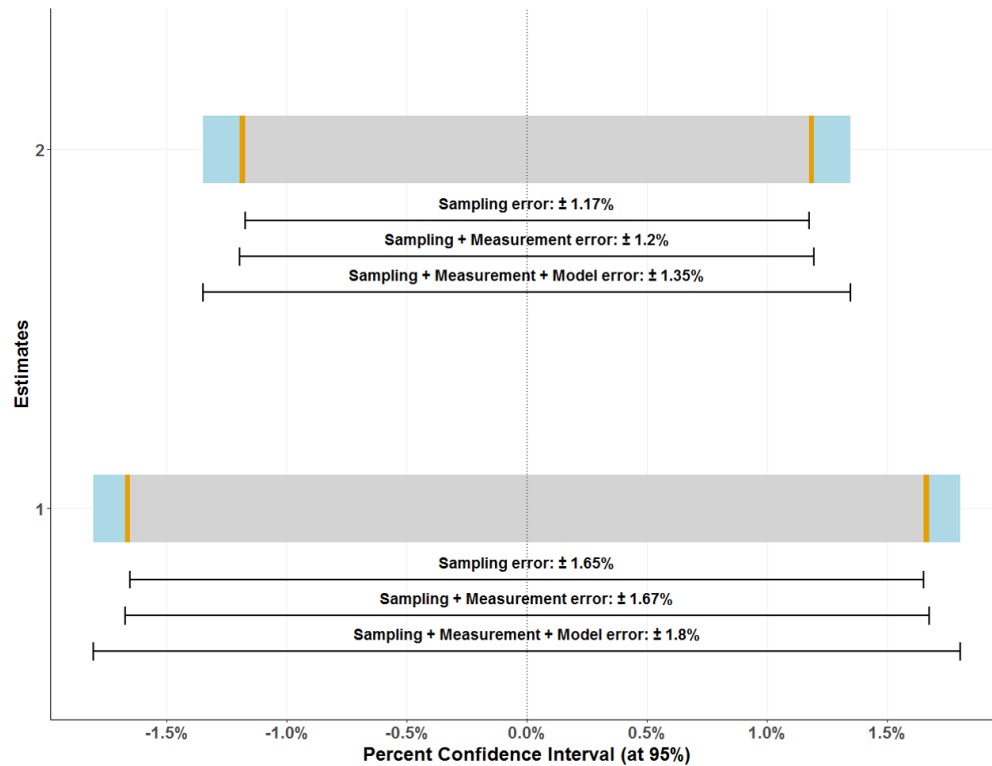

Figure 3: **Compounding errors.** Graphic representation of confidence intervals (at 95%) of two estimates of average tree volume density in Minnesota (Minnesota Survey Unit 1, USA). Both confidence intervals include three error sources: sampling error (in gray), measurement error (in yellow) and model error (in blue). In both cases the sampling error is the one that contributes the most to the total error. The confidence intervals are derived from data presented in McRoberts et al. (2016, Table 1)

665 considerable amount of information on the planning and implementation of  
666 the survey, on the data analysis and on the elaboration of the estimates.

667 In the context of LULUCF reporting, better (i.e., higher quality) un-  
668 certainty assessments including more error sources estimates will necessarily  
669 bring along wider compounded uncertainties, while systematic errors will  
670 be hardly avoided. This apparent absurdity can be rooted in the *uncer-*  
671 *tainty paradox*, wherein uncertainty aversion determines choices in individu-  
672 als/institutions (Roeser, 2014). In the current context it would imply that

673 Parties may prefer to report less accurate estimates as long as they present  
674 narrower errors. In fact, under UNFCCC (2009) guidance, the paradox is un-  
675 solved, since countries are advised to reduce uncertainties through increasing  
676 transparency. Technical assessments of Forest Reference Level submissions  
677 further advise countries to improve coverage on additional sources of errors  
678 (Sandker et al., 2018), which may factually balance the paradox on the side  
679 of transparency.

680 In order to improve the transparency of the reporting, we propose a list  
681 of the survey features that should be reported to enable judgment of the  
682 quality of the survey results. In this manuscript, the questions proposed for  
683 the interrogation of estimates for quality and the sources of error described  
684 apply both to ground-based surveys and remote sensing-assisted estimation  
685 of activity data. The impact of many sources of errors is often not measur-  
686 able, difficult to quantify or in the worst case, unknown. Further research  
687 is required especially on non sampling errors and techniques to propagate  
688 errors in general. It is important for a Party aiming to demonstrate the  
689 transparency of its results to explain whether and how they have tackled the  
690 main issues that may have an influence on the quality of the estimates.

## 691 **Acknowledgements**

692 The authors want to thank specially Becky Tavani and Julian Fox from  
693 the Forestry Department in FAO, and the entire UN-REDD program for  
694 their comments and continuous support in the preparation of this document.

## 695 **References**

696 Bastin JF, Berrahmouni N, Grainger A, Maniatis D, Mollicone D, Moore R,  
697 Patriarca C, Picard N, Sparrow B, Abraham EM, Aloui K, Atesoglu A,  
698 Attorre F, Bassüllü Ç, Bey A, Garzuglia M, García-Montero LG, Groot  
699 N, Guerin G, Laestadius L, Lowe AJ, Mamane B, Marchi G, Patterson P,  
700 Rezende M, Ricci S, Salcedo I, Diaz ASP, Stolle F, Surappaeva V, Castro R  
701 (2017) The extent of forest in dryland biomes. *Science* 356(6338):635–638,  
702 DOI 10.1126/science.aam6527

703 Bey A, Sánchez-Paus Díaz A, Maniatis D, Marchi G, Mollicone D, Ricci  
704 S, Bastin JF, Moore R, Federici S, Rezende M, Patriarca C, Turia R,  
705 Gamoga G, Abe H, Kaidong E, Miceli G (2016) *Collect Earth: Land Use*

- 706 and Land Cover Assessment through Augmented Visual Interpretation.  
707 Remote Sensing 8(10):807, DOI 10.3390/rs8100807
- 708 Birdsey R, Angeles-Perez G, Kurz WA, Lister A, Olguin M, Pan Y, Wayson  
709 C, Wilson B, Johnson K (2013) Approaches to monitoring changes in  
710 carbon stocks for REDD+. Carbon Management 4(5):519–537, DOI  
711 10.4155/cmt.13.49
- 712 Birigazzi L, Gamarra JGP, Gregoire TG (2018) Unbiased emission fac-  
713 tor estimators for large-area forest inventories: domain assessment tech-  
714 niques. Environmental and Ecological Statistics 25(2):199–219, DOI  
715 10.1007/s10651-018-0397-3
- 716 Brackstone G (2003) Managing data quality in a statistical  
717 agency. Tech. rep., United Nations, Santiago, Chile, URL  
718 [https://repositorio.cepal.org/bitstream/handle/11362/16457/  
719 S0340230.pdf?sequence=1](https://repositorio.cepal.org/bitstream/handle/11362/16457/S0340230.pdf?sequence=1)
- 720 Brancato G, Boggia A, Barbalace F, Cerroni F, Cozzi S, Bella GD,  
721 Zio MD, Filipponi D, Luzi O, Righi P, Scanu M (2016) Linee guida  
722 per la qualità dei processi statistici che utilizzano dati amministrativi.  
723 Tech. rep., ISTAT, URL [https://www.istat.it/it/files//2010/09/  
724 Linee-Guida-fonte-amministrativa-v1.1.pdf](https://www.istat.it/it/files//2010/09/Linee-Guida-fonte-amministrativa-v1.1.pdf)
- 725 Chambers R, Clark R (2012) An Introduction to Model-Based Survey Sam-  
726 pling with Applications. Oxford University Press, Oxford, UK, DOI  
727 10.1093/acprof:oso/9780198566625.001.0001
- 728 Chave J, Condit R, Aguilar S, Hernandez A, Lao S, Perez R (2004) Error  
729 propagation and scaling for tropical forest biomass estimates. Philosophical  
730 Transactions of the Royal Society of London Series B: Biological Sciences  
731 359(1443):409–420, DOI 10.1098/rstb.2003.1425
- 732 Chave J, Réjou-Méchain M, Búrquez A, Chidumayo E, Colgan MS, Delitti  
733 WB, Duque A, Eid T, Fearnside PM, Goodman RC, Henry M, Martínez-  
734 Yrizar A, Mugasha WA, Muller-Landau HC, Mencuccini M, Nelson BW,  
735 Ngomanda A, Nogueira EM, Ortiz-Malavassi E, Péliissier R, Ploton P, Ryan  
736 CM, Saldarriaga JG, Vieilledent G (2014) Improved allometric models to  
737 estimate the aboveground biomass of tropical trees. Global Change Biology  
738 20(10):3177–3190, DOI 10.1111/gcb.12629

- 739 Chirici G, Winter S, McRoberts RE (2011) National Forest Inventories: Con-  
740 tributions to Forest Biodiversity Assessments, Managing Forest Ecosys-  
741 tems, vol 20. Springer, Dordrecht, The Netherlands
- 742 Cifuentes Jara M, Henry M, Réjou-Méchain M, Wayson C, Zapata-Cuartas  
743 M, Piotto D, Guier FA (2015) Guidelines for documenting and reporting  
744 tree allometric equations. *Annals of Forest Science* 72(6):763–768, DOI  
745 10.1007/s13595-014-0415-z
- 746 Claeskens G, Hjørt NL (2008) Model Selection and Model Averaging. Cam-  
747 bridge University Press, Cambridge, UK, DOI 10.1080/02664760902899774
- 748 Cochran WG (1977) Sampling Techniques 3rd ed. Wiley publication in ap-  
749 plied statistics, John Wiley & Sons: New York
- 750 Cressie N, Kornak J (2003) Spatial statistics in the presence of location  
751 error with an application to remote sensing of the environment. *Statistical*  
752 *Science* 18(4):436–456, DOI 10.1214/ss/1081443228
- 753 Cunia T (1986) Error of forest inventory estimates: Its main components.  
754 In: Wharton EH, Cunia T (eds) Estimating tree biomass regressions and  
755 their error. USDA Forest Service NE-GTR-117, Syracuse, NY
- 756 Curran PJ, Hay AM (1986) The importance of measurement error for Cer-  
757 tain procedures in remote sensing at optical wavelengths. *Photogrammetric*  
758 *Engineering and Remote Sensing* 52(2):229–241
- 759 Duncanson L, Huang W, Johnson K, Swatantran A, McRoberts RE,  
760 Dubayah R (2017) Implications of allometric model selection for county-  
761 level biomass mapping. *Carbon Balance and Management* 12(1):18, DOI  
762 10.1186/s13021-017-0086-9
- 763 Duvemo K, Lämås T (2006) The influence of forest data quality on planning  
764 processes in forestry. *Scandinavian Journal of Forest Research* 21(4):327–  
765 339, DOI 10.1080/02827580600761645
- 766 FAO (2016) Map Accuracy Assessment and Area Estimation: A Practi-  
767 cal Guide. Tech. rep., Food and Agriculture Organization of the United  
768 Nations. National forest monitoring assessment working paper No.46/E.,  
769 Rome, URL <http://www.fao.org/3/a-i5601e.pdf>

- 770 Ferretti M, König N, Rautio P, Sase H (2009) Quality assurance (QA) in  
771 international forest monitoring programmes: activity, problems and per-  
772 spectives from East Asia and Europe. *Annals of Forest Science* 66(4):1–12,  
773 DOI 10.1051/forest/2009025
- 774 Fox JC, Vieilledent G, Yosi CK, Pokana JN, Keenan RJ (2011) Aboveground  
775 forest carbon dynamics in Papua New Guinea: isolating the influence of  
776 selective harvesting and El Niño. *Ecosystems* 14(8):1276–1288, DOI 10.  
777 1007/s10021-011-9480-4
- 778 Full S, Haworth M, Stephens A (2001) Quality measurement and reporting in  
779 the UK office for national statistics. In: *Proceedings of Statistics Canada*  
780 *Symposium 2001 Achieving Data Quality in a Statistical Agency: A*  
781 *Methodological Perspective*, URL [https://www150.statcan.gc.ca/n1/](https://www150.statcan.gc.ca/n1/en/pub/11-522-x/2001001/session21/6298-eng.pdf?st=QmN-ivsa)  
782 [en/pub/11-522-x/2001001/session21/6298-eng.pdf?st=QmN-ivsa](https://www150.statcan.gc.ca/n1/en/pub/11-522-x/2001001/session21/6298-eng.pdf?st=QmN-ivsa)
- 783 Gasparini P, Bertani R, De Natale F, Di Cosmo L, Pompei E (2009) Qual-  
784 ity control procedures in the Italian national forest inventory. *Journal of*  
785 *Environmental Monitoring* 11(4):761–768, DOI 10.1039/b818164k
- 786 GFOI (2016) Integration of remote-sensing and ground-based observa-  
787 tions for estimation of emissions and removals of greenhouse gases  
788 in forests: Methods and Guidance from the Global Forest Obser-  
789 vations Initiative. Tech. rep., Food and Agriculture Organization,  
790 Rome, URL [https://www.reddcompass.org/documents/184/0/MGD2.](https://www.reddcompass.org/documents/184/0/MGD2.0{\_}English/c2061b53-79c0-4606-859f-ccf6c8cc6a83)  
791 [0{\\\_}English/c2061b53-79c0-4606-859f-ccf6c8cc6a83](https://www.reddcompass.org/documents/184/0/MGD2.0{\_}English/c2061b53-79c0-4606-859f-ccf6c8cc6a83)
- 792 Gonzalez ME, Ogus JL, Shapiro G, Tepping BJ (1975) Standards for discus-  
793 sion and presentation of errors in survey and census data. *Journal of the*  
794 *American Statistical Association* 70(351b):5–23, DOI 10.2307/2286149
- 795 Gormanson DD, Pugh SA, Barnett CJ, Miles PD, Morin RS, Sowers PA,  
796 Westfall JA (2018) Statistics and quality assurance for the Northern Re-  
797 search Station Forest Inventory and Analysis program 2010. Tech. rep.,  
798 Gen. Tech. Rep. NRS-178. Newtown Square, PA: U.S. Department of  
799 Agriculture, Forest Service, Northern Research Station. 25 p., DOI  
800 10.2737/NRS-GTR-178, URL <https://www.nrs.fs.fed.us/pubs/55599>
- 801 Gregoire TG, Valentine HT (2008) *Sampling Strategies for Natural Resources*  
802 *and the Environment*. Chapman & Hall/CRC, New York

- 803 Hanson R (1978) The current population survey: design and methodology  
804 (Vol. 40). Tech. rep., U.S. Department of Commerce, Bureau of the Census.
- 805 Heath LS, Smith JE (2000) An assessment of uncertainty in forest carbon  
806 budget projections. *Environmental Science & Policy* 3(2-3):73–82, DOI  
807 10.1016/s1462-9011(00)00075-7
- 808 Hill TC, Williams M, Bloom AA, Mitchard ETA, Ryan CM (2013) Are in-  
809 ventory based and remotely sensed above-ground biomass estimates con-  
810 sistent? *PLoS ONE* 8(9):e74,170, DOI 10.1371/journal.pone.0074170
- 811 IPCC (2003) Good practice guidance for land use, land-use change and  
812 forestry. Kanagawa, Japan
- 813 IPCC (2006) Guidelines for National Greenhouse Gas Inventories. Institute  
814 for Global Environmental Strategies, Kanagawa
- 815 Jackson AA, Johnson TA, Jost SJ, Mcgrath BE, Wright T (2013) U.S.  
816 Census Bureau statistical quality standards. Tech. rep., U.S. Cen-  
817 sus Bureau, URL [https://www.census.gov/content/dam/Census/  
818 about/about-the-bureau/policies{\\\_}and{\\\_}notices/quality/  
819 statistical-quality-standards/Quality{\\\_}Standards.pdf](https://www.census.gov/content/dam/Census/about/about-the-bureau/policies{\_}and{\_}notices/quality/statistical-quality-standards/Quality{\_}Standards.pdf)
- 820 Kangas A, Maltamo M (2006) Forest Inventory: Methodology and Applica-  
821 tions, *Managing Forest Ecosystems*, vol 10. Springer Netherlands, DOI  
822 10.1007/1-4020-4381-3
- 823 Kennedy RE, Townsend PA, Gross JE, Cohen WB, Bolstad P, Wang Y,  
824 Adams P (2009) Remote sensing change detection tools for natural resource  
825 managers: Understanding concepts and tradeoffs in the design of landscape  
826 monitoring projects. *Remote Sensing of Environment* 113(7):1382–1396,  
827 DOI 10.1016/j.rse.2008.07.018
- 828 Köhl M, Magnussen S, Marchetti M (2006) Sampling Methods, Remote Sens-  
829 ing and GIS Multiresource Forest Inventory. *Tropical Forestry*, Springer  
830 Berlin Heidelberg, DOI 10.1007/978-3-540-32572-7
- 831 Köhl M, Scott CT, Lister AJ, Demon I, Plugge D (2015) Avoiding treatment  
832 bias of REDD+ monitoring by sampling with partial replacement. *Carbon*  
833 *Balance and Management* 10:11, DOI 10.1186/s13021-015-0020-y

- 834 Ku H (1966) Notes on the use of propagation of error formulas. *Journal of*  
835 *Research of the National Bureau of Standards-C: Engineering and Instru-*  
836 *mentation* 70C:263–273, DOI 10.6028/jres.070C.025
- 837 Larjavaara M, Muller-Landau HC (2013) Measuring tree height: A quanti-  
838 tative comparison of two common field methods in a moist tropical forest.  
839 *Methods in Ecology and Evolution* 4:793–801, DOI 10.1111/2041-210X.  
840 12071
- 841 Lesser VM, Kalsbeek WD (1999) Nonsampling errors in environmental sur-  
842 veys. *Journal of Agricultural, Biological, and Environmental Statistics*  
843 4:473–488, DOI 10.2307/1400503
- 844 Magnussen S, Carillo Negrete OI (2015) Model errors in tree biomass esti-  
845 mates computed with an approximation to a missing covariance matrix.  
846 *Carbon Balance and Management* 10:21, DOI 10.1186/s13021-015-0031-8
- 847 Mandallaz D (2008) *Sampling Techniques for Forest Inventories*. Chapman  
848 and Hall/CRC, New York
- 849 Markham BL, Storey JC, Williams DL, Irons JR (2004) Landsat sensor per-  
850 formance: history and current status. *IEEE Transactions on Geoscience*  
851 *and Remote Sensing* 42(12):2691–2694, DOI 10.1109/TGRS.2004.840720
- 852 McMurray A, Pearson T, Casirim F (2017) Guidance on applying the Monte  
853 Carlo approach to uncertainty analyses in forestry and greenhouse gas ac-  
854 counting. Tech. rep., Winrock International, URL [https://www.winrock.](https://www.winrock.org/wp-content/uploads/2018/03/UncertaintyReport-12.26.17.pdf)  
855 [org/wp-content/uploads/2018/03/UncertaintyReport-12.26.17.pdf](https://www.winrock.org/wp-content/uploads/2018/03/UncertaintyReport-12.26.17.pdf)
- 856 McRoberts RE (2014) Post-classification approaches to estimating change  
857 in forest area using remotely sensed auxiliary data. *Remote Sensing of*  
858 *Environment* 151:149–156, DOI 10.1016/j.rse.2013.03.036
- 859 McRoberts RE, Westfall JA (2016) Propagating uncertainty through individ-  
860 ual tree volume model predictions to large-area volume estimates. *Annals*  
861 *of Forest Science* 73(3):625–633, DOI 10.1007/s13595-015-0473-x
- 862 McRoberts RE, Tomppo EO, Czaplewski RL (2015) Sampling designs for  
863 national forest assessments. In: *Knowledge Reference for National Forest*  
864 *Assessments*, FAO, Rome, Italy, pp 23–40



- 865 McRoberts RE, Chen Q, Domke GM, Ståhl G, Saarela S, Westfall JA (2016)  
866 Hybrid estimators for mean aboveground carbon per unit area. *Forest Ecology and Management* 378:44–56, DOI 10.1016/J.FORECO.2016.07.007  
867
- 868 McRoberts RE, Stehman SV, Liknes GC, Næsset E, Sannier C, Walters BF  
869 (2018) The effects of imperfect reference data on remote sensing-assisted estimators of land cover class proportions. *ISPRS Journal of Photogrammetry and Remote Sensing* 142:292–300, DOI 10.1016/j.isprsjprs.2018.06.002  
870  
871
- 872 Molto Q, Rossi V, Blanc L (2013) Error propagation in biomass estimation in tropical forests. *Methods in Ecology and Evolution* 4(2):175–183, DOI 10.1111/j.2041-210x.2012.00266.x  
873  
874
- 875 Morales-Hidalgo D, Kleinn C, Scott CT (2017) *Voluntary Guidelines on National Forest Monitoring*. FAO, Rome, Italy  
876
- 877 Office for National Statistics (2007) *Guidelines for measuring statistical quality*. Tech. rep., Office for National Statistics, London, URL [https://unstats.un.org/unsd/dnss/docs/nqaf/UK-Guidelines{\\\_}Subject.pdf](https://unstats.un.org/unsd/dnss/docs/nqaf/UK-Guidelines{\_}Subject.pdf)  
878  
879  
880
- 881 Olofsson P, Foody GM, Stehman SV, Woodcock CE (2013) Making better use of accuracy data in land change studies: Estimating accuracy and area and quantifying uncertainty using stratified estimation. *Remote Sensing of Environment* 129:122–131, DOI 10.1016/j.rse.2012.10.031  
882  
883  
884
- 885 Olofsson P, Foody GM, Herold M, Stehman SV, Woodcock CE, Wulder MA (2014) Good practices for estimating area and assessing accuracy of land change. *Remote Sensing of Environment* 148:42–57, DOI 10.1016/j.rse.2014.02.015  
886  
887  
888
- 889 Pelletier J, Ramankutty N, Potvin C (2011) Diagnosing the uncertainty and detectability of emission reductions for REDD + under current capabilities: An example for Panama. *Environmental Research Letters* 6(2):024,005, DOI 10.1088/1748-9326/6/2/024005  
890  
891  
892
- 893 Picard N, Boyemba Bosela F, Rossi V (2015) Reducing the error in biomass estimates strongly depends on model selection. *Annals of Forest Science* 72(6):811–823, DOI 10.1007/s13595-014-0434-9  
894  
895

- 896 Pollard JE, Westfall JA, Patterson PL, Gartner DL, Hansen M, Kuegler  
897 O (2006) Forest Inventory and Analysis national data quality assessment  
898 report for 2000 to 2003. Tech. rep., DOI 10.2737/RMRS-GTR-181, URL  
899 <https://www.fs.usda.gov/treesearch/pubs/24523>
- 900 Potapov P, Dempewolf J, Talero Y, Hansen M, Stehman S, Vargas C, Rojas  
901 E, Castillo D, Mendoza E, Calderón A, et al. (2014) National satellite-  
902 based humid tropical forest change assessment in Peru in support of  
903 REDD+ implementation. *Environmental Research Letters* 9(12):124,012,  
904 DOI 10.1088/1748-9326/9/12/124012
- 905 R Core Team (2016) R: A Language and Environment for Statistical Com-  
906 puting. R Foundation for Statistical Computing, Vienna, Austria, URL  
907 <https://www.R-project.org/>
- 908 Raj D (1968) *Sampling Theory*. McGraw-Hill, New York
- 909 Rao JNK, Molina I (2015) *Small Area Estimation*. John Wiley & Sons, DOI  
910 10.1002/9781118735855
- 911 Réjou-Méchain M, Tanguy A, Piponiot C, Chave J, Hérault B (2017)  
912 BIOMASS: an R package for estimating above-ground biomass and its un-  
913 certainty in tropical forests. *Methods in Ecology and Evolution* 8(9):1163–  
914 1167, DOI 10.1111/2041-210X.12753
- 915 Roeser S (2014) The unbearable uncertainty paradox. *Metaphilosophy* 45(4-  
916 5):640–653, DOI 10.1111/meta.12110
- 917 Rubinstein RY, Kroese DP (2008) *Simulation and the Monte Carlo Method*.  
918 *Wiley Series in Probability and Statistics*, John Wiley & Sons, DOI 10.  
919 1111/j.1751-5823.2009.00074\_8.x
- 920 Sandker M, Birigazzi L, Córdor R, Gamarra JG, Lee D, Mahmood A,  
921 Mertens E, Neef T, Parra A, Todd K (2018) From reference levels to re-  
922 sults reporting. REDD+ under the UNFCCC: 2018 update. Tech. rep.,  
923 *Forests and Climate Change Working Paper 16*. Food and Agriculture Or-  
924 ganization of the United Nations, Rome, URL [http://www.fao.org/3/](http://www.fao.org/3/CA0176EN/ca0176en.pdf)  
925 [CA0176EN/ca0176en.pdf](http://www.fao.org/3/CA0176EN/ca0176en.pdf)
- 926 Särndal CE, Lundström S (2005) *Estimation in Surveys with Nonresponse*.  
927 John Wiley & Sons, DOI 10.1002/0470011351

- 928 Särndal CE, Swensson B, Wretman J (1992) Model Assisted Survey Sam-  
929 pling, Wiley Series in Probability and Statistics, vol 77. Springer-Verlag,  
930 New York, DOI 10.2307/3619754
- 931 Schreuder HT, Gregoire TG, Wood GB (1993) Sampling Methods for Mul-  
932 tiresource Forest Inventory. Wiley
- 933 Ståhl G, Heikkinen J, Petersson H, Repola J, Holm S (2014) Sample-based  
934 estimation of greenhouse gas emissions from forests-a new approach to  
935 account for both sampling and model errors. *Forest Science* 60(1):3–13,  
936 DOI 10.5849/forsci.13-005
- 937 Ståhl G, Saarela S, Schnell S, Holm S, Breidenbach J, Healey SP, Patter-  
938 son PL, Magnussen S, Næsset E, McRoberts RE, Gregoire TG (2016)  
939 Use of models in large-area forest surveys: comparing model-assisted,  
940 model-based and hybrid estimation. *Forest Ecosystems* 3(1):5, DOI  
941 10.1186/s40663-016-0064-9
- 942 Statistical Office of the United Nations (1950) The preparation of sampling  
943 survey reports. *The American Statistician* 4(3):6–12, DOI 10.2307/2682337
- 944 Statistics Canada (2000) Policy on Informing Users of Data Quality and  
945 Methodology. URL [https://www.statcan.gc.ca/eng/about/policy/  
946 info-user](https://www.statcan.gc.ca/eng/about/policy/info-user)
- 947 Stehman SV, Czaplewski RL (1998) Design and analysis for thematic map  
948 accuracy assessment: fundamental principles. *Remote Sensing of Environ-*  
949 *ment* 64(3):331–344, DOI 10.1016/S0034-4257(98)00010-8
- 950 Stehman SV, Wickham JD (2011) Pixels, blocks of pixels, and polygons:  
951 choosing a spatial unit for thematic accuracy assessment. *Remote Sensing*  
952 *of Environment* 115(12):3044–3055, DOI 10.1016/j.rse.2011.06.007
- 953 UNFCCC (2009) Methodological guidance for activities relating to reducing  
954 emissions from deforestation and forest degradation and the role of con-  
955 servation, sustainable management of forests and enhancements of forest  
956 carbon stocks in developing countries. United National Framework Con-  
957 vention on Climate Change Decision 4/CP.15, URL [https://unfccc.int/  
958 resource/docs/2009/cop15/eng/11a01.pdf#page=11](https://unfccc.int/resource/docs/2009/cop15/eng/11a01.pdf#page=11)

- 959 de Vries PG (1986) Sampling Theory for Forest Inventory. Springer, Berlin,  
960 DOI 10.1007/978-3-642-71581-5
- 961 Wayson CA, Johnson KD, Cole JA, Olgún MI, Carrillo OI, Birdsey RA  
962 (2015) Estimating uncertainty of allometric biomass equations with in-  
963 complete fit error information using a pseudo-data approach: methods.  
964 *Annals of Forest Science* 72(6):825–834, DOI 10.1007/s13595-014-0436-7
- 965 Woodall CW, Heath LS, Domke GM, Nichols MC (2010) Methods and equa-  
966 tions for estimating aboveground volume, biomass, and carbon for trees  
967 in the U.S. Forest Inventory, 2010. USDA Forest Service Gen Tech. Rep.  
968 NRS-88

## Supplementary Materials

### Summary of the key questions

#### General information about the survey

##### 1. Sampled population

- (a) What is the population from which the sample is chosen?
- (b) If the sampled population is defined as a geographic area, are you able to provide a map of it?
- (c) Is the sampled population defined as a finite set of discrete spatial units? If so, which ones? are they uniform? what is their area?

##### 2. Target population

- (a) What is the population for which we want to estimate emissions/removals?
- (b) For which time period do we need the emissions/removals?
- (c) If the target population is defined as a geographic area, are you able to provide a map of it?
- (d) If the target population is not defined as a geographic area, are you able to provide a list of the elements that compose it?

##### 3. Sampling selection

- (a) Is the survey based on a probability sample?
- (b) What sampling design has been used?
- (c) What was the planned size of the sample?
- (d) What is the size and shape of the sampling units?
- (e) Is the sampling unit composed of a cluster of subplots?
- (f) Is the sampling unit composed of one or more nested smaller subplots?
- (g) Was the sample selected following stratified sampling?
- (h) If so, which are the strata? how were they constructed? What is their size?

- 996 (i) If so, when the strata are defined as geographical areas, are you  
997 able to provide a map of them?
- 998 (j) Repetition: Is the survey isolated or is it part of a series of re-  
999 peated surveys? If so, what is the proportion of samples that  
1000 were repeated?

#### 1001 4. Data collection and processing

- 1002 (a) Which attributes have been observed in the sampling units?
- 1003 (b) What was the measurement protocol used to measure the variables  
1004 of interest?
- 1005 (c) Has a written field manual or evaluation protocol been produced?  
1006 Can the party provide it?
- 1007 (d) Can the party provide a clear and unambiguous definition for each  
1008 class of categorical variables in the survey, including a land cover  
1009 classification system (if any)?
- 1010 (e) Has the classification system (if any) been modified during the  
1011 implementation of the survey? If so, how does that impact the  
1012 final estimates? Did the party put in place any system to account  
1013 for this change?
- 1014 (f) Has the field measurement protocol been changed during the im-  
1015 plementation of the survey? If so, how does that impact the final  
1016 estimates? Did the party put in place any system to account for  
1017 this change?
- 1018 (g) How were the data stored and processed?

#### 1019 Information about error sources

#### 1020 5. Sampling error

- 1021 (a) Which estimator has been used to estimate the emission/removal?  
1022 Can the party provide the mathematical formula used?
- 1023 (b) Has the variance of the estimator been estimated? If so, which  
1024 estimator was used to compute it? Can the party provide the  
1025 mathematical formula used?

- 1026 (c) Is the estimator for the population parameter and its variance  
1027 estimator unbiased (or approximately unbiased) under the sample  
1028 design adopted in the survey?

1029 **6. Model error**

- 1030 (a) Was the variable of interest observed or estimated using a model?  
1031 (b) If so, what model was used?  
1032 (c) What auxiliary variables have been used to estimate the variable  
1033 of interest? How have they been collected?  
1034 (d) Were the auxiliary variables available for all population elements?  
1035 (e) Was the model developed independently of the survey (i.e. se-  
1036 lected from models already published in the literature)?  
1037 (f) How was the model selected and how can the party ensure that  
1038 the population for which the model was developed is similar to  
1039 the target population?  
1040 (g) If the data used to develop the model were collected within the  
1041 survey, can the party provide a description of the survey design  
1042 and of the model fitting method?  
1043 (h) Was the error in model parameters estimated? how?

1044 **7. Under-coverage**

- 1045 (a) Is the area over which we want to report the emission/removals  
1046 entirely included in the area that has been sampled?  
1047 (b) If not, how did the party ensure the estimates are representative  
1048 of whole target population?

1049 **8. Over-coverage (domain estimation)**

- 1050 (a) Is the area over which we want to report the emission/removals  
1051 (the target population) smaller than the area that has been sam-  
1052 pled and included in it?  
1053 (b) If so, has the party used any domain estimation techniques? Which  
1054 ones?

1055 **9. Non-response**



- 1056 (a) Did the party put in place any measure for the prevention or  
1057 avoidance of non-response before the data collection? If yes, which  
1058 ones?
- 1059 (b) How many of the selected sampling units have proven to be not  
1060 measurable/not accessible?
- 1061 (c) Which are the main causes for the non-response? Are there any  
1062 reason to believe that non-responding elements may be systemat-  
1063 ically different from the responding ones?
- 1064 (d) Did the party adjust the estimate to overcome the fact that not  
1065 all the sampling units have been measured/accessed? If so, how?

1066 **10. Time coverage issues**

- 1067 (a) When was the data collection carried out? What is the time period  
1068 in which the variables of interest were observed?
- 1069 (b) Is the period over which we want to report emissions/removals  
1070 included in the data collection period?
- 1071 (c) If not, how did the party ensure that estimates are representative  
1072 of the reporting time period?

1073 **11. Measurement error**

- 1074 (a) Which measuring instruments were used to measure the variables  
1075 of interest? Is there any information available about the nominal  
1076 precision of the measuring instruments used?
- 1077 (b) Which instruments were used to record the geographical location  
1078 of the observations? Is there any information available about the  
1079 nominal precision of the instruments used?
- 1080 (c) Can the party provide the precision with which each measurement  
1081 is taken (for example, diameter at breast height to be recorded in  
1082 cm to the nearest 0.1 cm)?
- 1083 (d) Did the party put in place any measure for the reduction of the  
1084 measurement error (including position error)? If yes, which ones?
- 1085 (e) How many observers/field teams have been employed in the sur-  
1086 vey?

- 1087 (f) which satellite products were used to estimate activity data? what  
1088 are the product specifications?

1089 **12. Processing errors**

- 1090 (a) Did the party put in place any measure(s) for the prevention of  
1091 data entry error in the field and in the office? If yes, which?  
1092 (b) Which methods were used for the identification of invalid or aber-  
1093 rant values after the data were entered?  
1094 (c) Which methods were used for correcting missing data and outliers?

1095 **Information about the total error**

1096 **13. Error propagation**

- 1097 (a) Did the Party propagate errors to establish the total error?  
1098 (b) Were all the errors symmetric or normally distributed? If not,  
1099 how were those errors reported?  
1100 (c) Which assumptions were taken in regard to the existence of cor-  
1101 relations among the different errors?  
1102 (d) If errors were propagated, which method was used and how was  
1103 it justified?  
1104 (e) If the total error followed an asymmetric distribution, how was it  
1105 reported?
